# Supplementary material for: VO2/rGO nanorods as a potential anode for sodium- and lithium-ion batteries
Source: Royal Society of Chemistry journal article supplement (doi:10.1039/c5ta03188e), 2015-01-01

## Supporting Information

### VO<sub>2</sub>/rGO Nanorods as A Potential Anode for Sodium- and Lithium-ion Batteries

Guang He, Longjun Li, Arumugam Manthiram\*

*Materials Science and Engineering Program & Texas Materials Institute, The University of Texas at Austin, Austin, TX, 78712, USA*

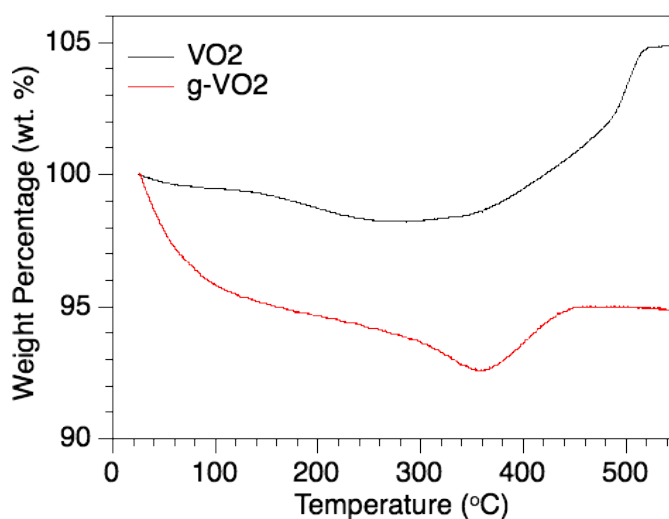

**Figure S1** TGA of VO<sub>2</sub> and g-VO<sub>2</sub> nanocomposite in air at 5 °C min<sup>-1</sup>.

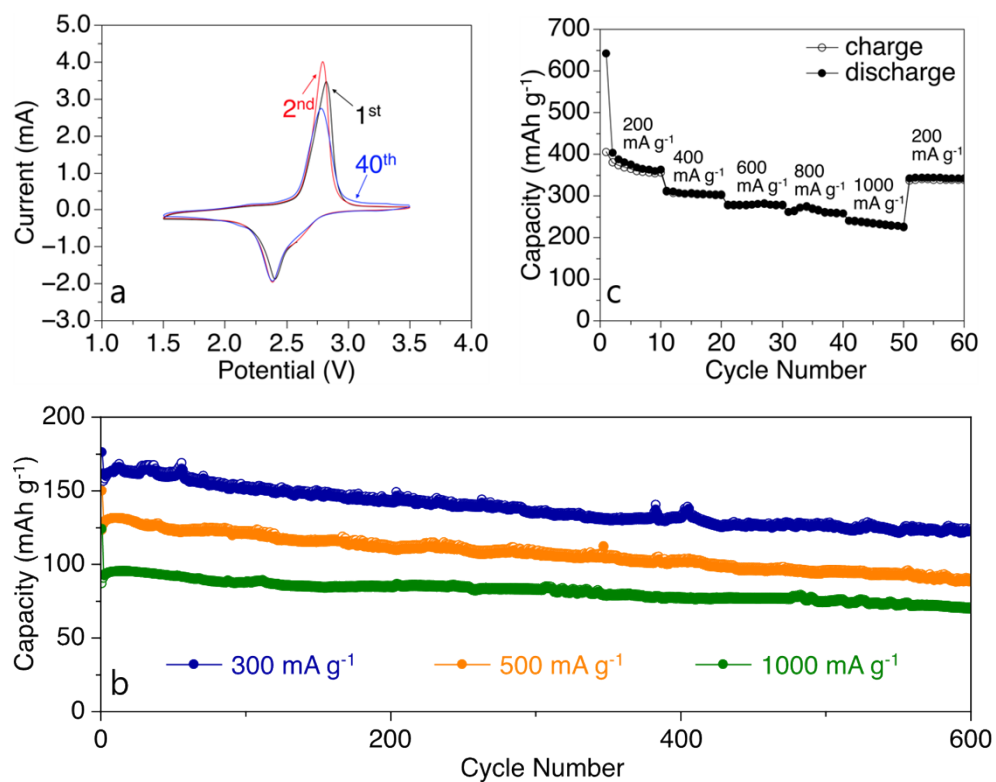

**Figure S2** (a) CV curves at  $0.5 \text{ mV s}^{-1}$  and (b) long-term cycling stability at different current densities in the window of 3.3 – 1.5 V. (c) Rate capability in the window of 3 – 0.05 V.

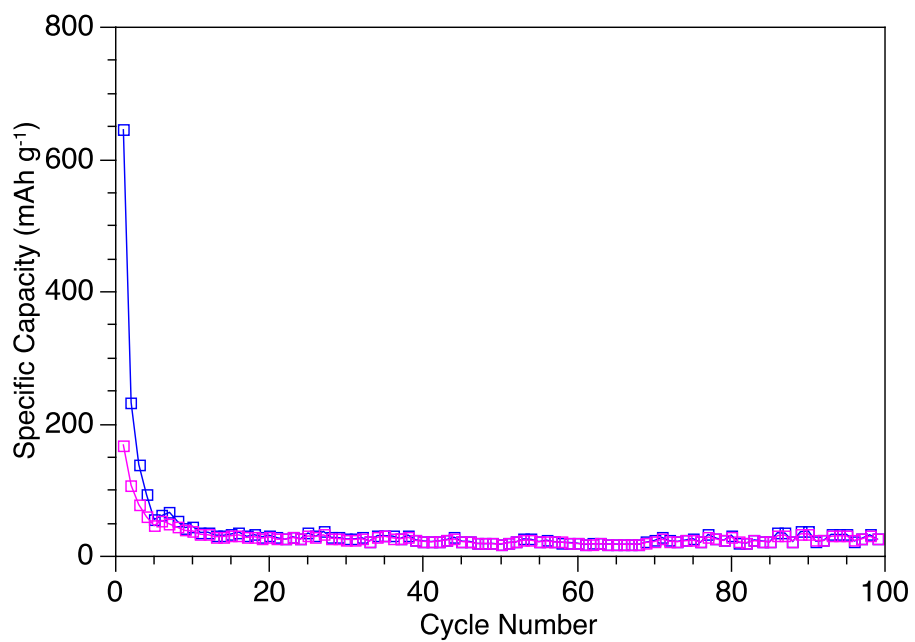

**Figure S3** Cycling capacities of the rGO electrodes. Blue and magenta empty squares represent the specific discharge and charge capacities, respectively.

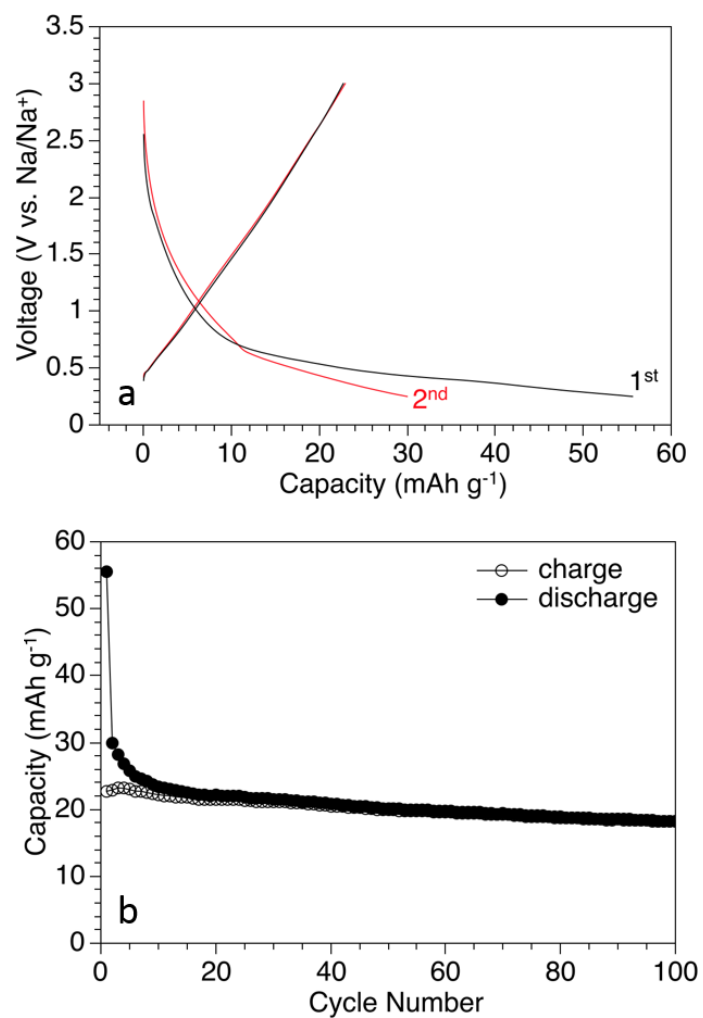

**Figure S4** Electrochemical performance of the  $\text{VO}_2$  (B) without rGO.

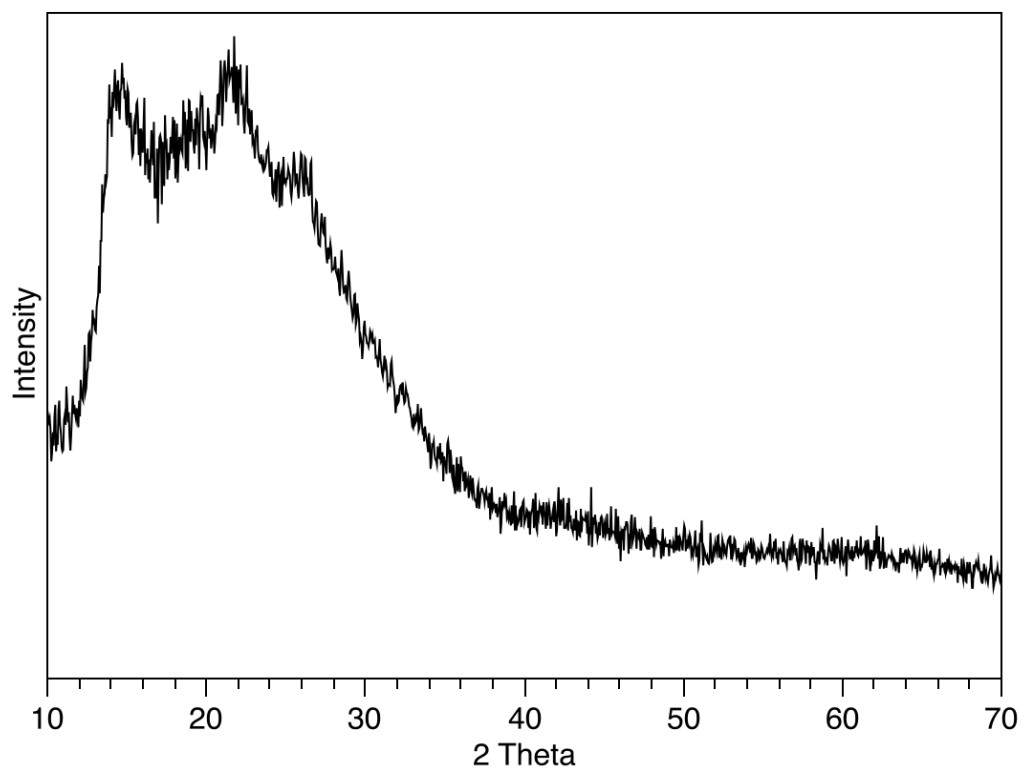

**Figure S5** XRD patterns of the glass holder with Kapton film.

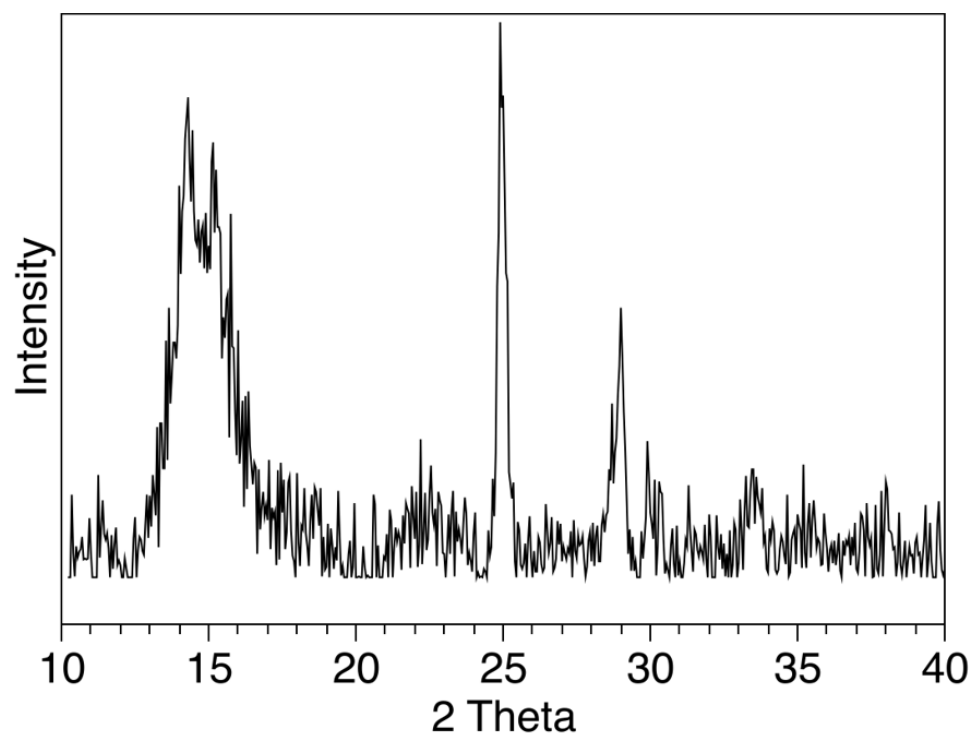

**Figure S6** XRD pattern of VO<sub>2</sub> (B) after the initial discharge to 0.25 V.

# TOC

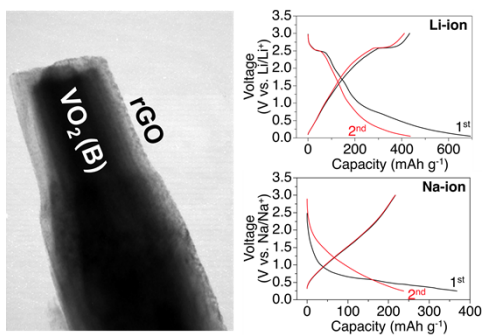

Supplement: c5ta03188e1.pdf [file c5ta03188e1.pdf]
